# Supplementary material for: Synthesis of homochiral zeolitic imidazolate frameworks via solvent-assisted linker exchange for enantioselective sensing and separation
Source: Royal Society of Chemistry journal article supplement (doi:10.1039/c8ce00403j), 2018-01-01
Supplement: c8ce00403j1.pdf [file c8ce00403j1.pdf]

## Supporting Information

# Synthesis of homochiral zeolitic imidazolate frameworks *via* solvent-assisted linker exchange for enantioselective sensing and separation

Chao Zhuo, Fei Wang\* and Jian Zhang\*

State Key Laboratory of Structural Chemistry, Fujian Institute of Research on the Structure of Matter, Chinese Academy of Sciences, Fujian 350002, Fuzhou, PR China.

E-mail: [zhj@fjirsm.ac.cn](mailto:zhj@fjirsm.ac.cn), [wangfei04@fjirsm.ac.cn](mailto:wangfei04@fjirsm.ac.cn)

## Materials and methods

All materials were commercially available in analytical grade and used without further purification.

<sup>1</sup>H NMR spectra were recorded with an AVANCE III (400 MHz) spectrometer. IR spectra were recorded with a VERTEX70 FT-IR spectrophotometer. UV-Vis spectra were recorded with a Lambda 950 spectrophotometer. Powder X-ray diffractograms (PXRDs) were recorded on a MiniFlex II powder X-ray diffractometer. The elemental analysis results were obtained by a vario MICRO elemental analyser. Thermogravimetric analyses (TGA) (N<sub>2</sub> atmosphere, heating rate of 10 °C/min) were carried out with a NETZSCH STA 449F3 TGA apparatus. The liquid and solid-state CD spectra were recorded using Biologic Science Instruments at 25 °C.

## Preparation of S(R)-OH-bim

S(R)-OH-bim was synthesized according to previous report.<sup>1</sup>

## Preparation of ZIF-78

Crystal sample of ZIF-78 was synthesized according to previous report.<sup>2</sup>

## Preparation of S(R)-ZIF-78h through SALE

1.62 g (10 mmol) S-OH-bim was dissolved in 40 mL n-butyl alcohol to obtain 0.25 M stock solution. And 100 mg as-synthesized ZIF-78 was placed in a 13 mL sealed glass bottle along with 5 mL stock solution above. Then it was allowed to reaction at 120 °C for 7 days, but the solution need to be replaced with fresh stock solution every 24 hours. The solid sample was washed and collected as S-ZIF-78h in approximately 80% yield. R-ZIF-78h was prepared in the same way except for R-OH-bim replacing S-OH-bim.

## CD measurement of D(L)-proline with S-ZIF-78h

D(L)-proline standard aqueous solutions were prepared in concentration of 0.07M. Then they were mixed in a volume ratio of 4:1, 3:1, 2:1, 1:1, 1:2, 1:3 and 1:4. Once the CD signals of those mixed samples were recorded, 0.1mg S-ZIF-78h was added into 2mL of them each, following by another measurement in 10 seconds. All the quantities used here were according to condition optimization.

## Elemental analysis

**ZIF-78** structure formula:  $\text{Zn}(\text{2-nim})(\text{5-nbim})$ , molecule formula:  $\text{ZnC}_{10}\text{H}_6\text{N}_6\text{O}_4$ , calculated: C 35.37%, H 1.78%, N 24.75%, found: 34.23%, H 2.21%, N 23.52%.

**S-ZIF-78h** Structure formula:  $\text{Zn}(\text{2-nim})(\text{5-nbim})_{0.743}(\text{S-OH-bim})_{0.257}$ , molecule formula:  $\text{ZnC}_{10.514}\text{H}_{7.285}\text{N}_{5.743}\text{O}_{3.743}$ , calculated: C 37.21%, H 2.16%, N 23.70%, found: C 37.57%, H 2.68%, N 22.26%.

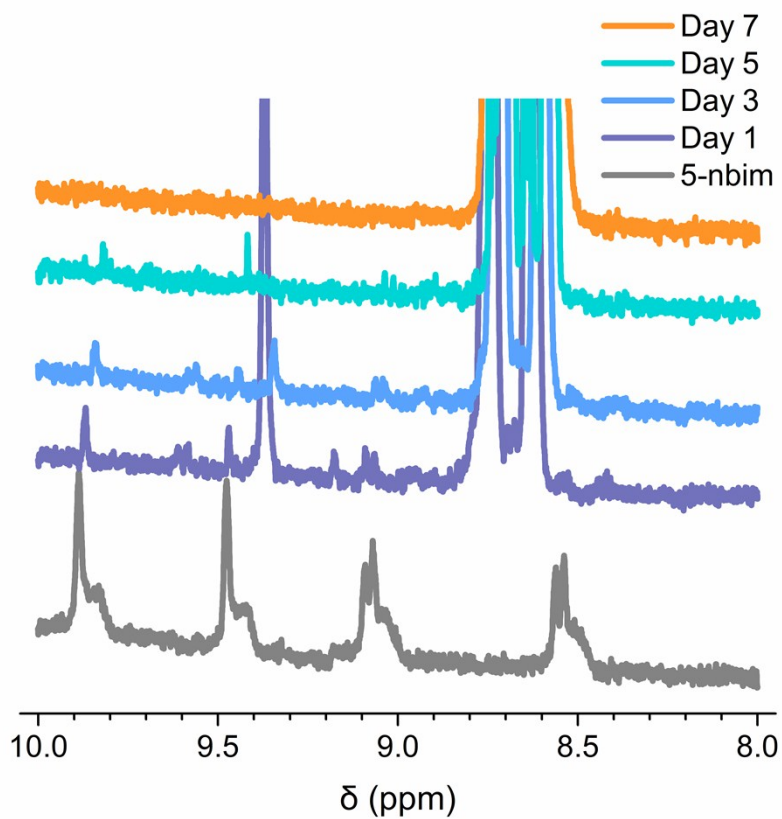

**Fig. S1** <sup>1</sup>H NMR spectra (d-TFA) of 5-nbim in n-butanol solution and solutions replaced at different day.

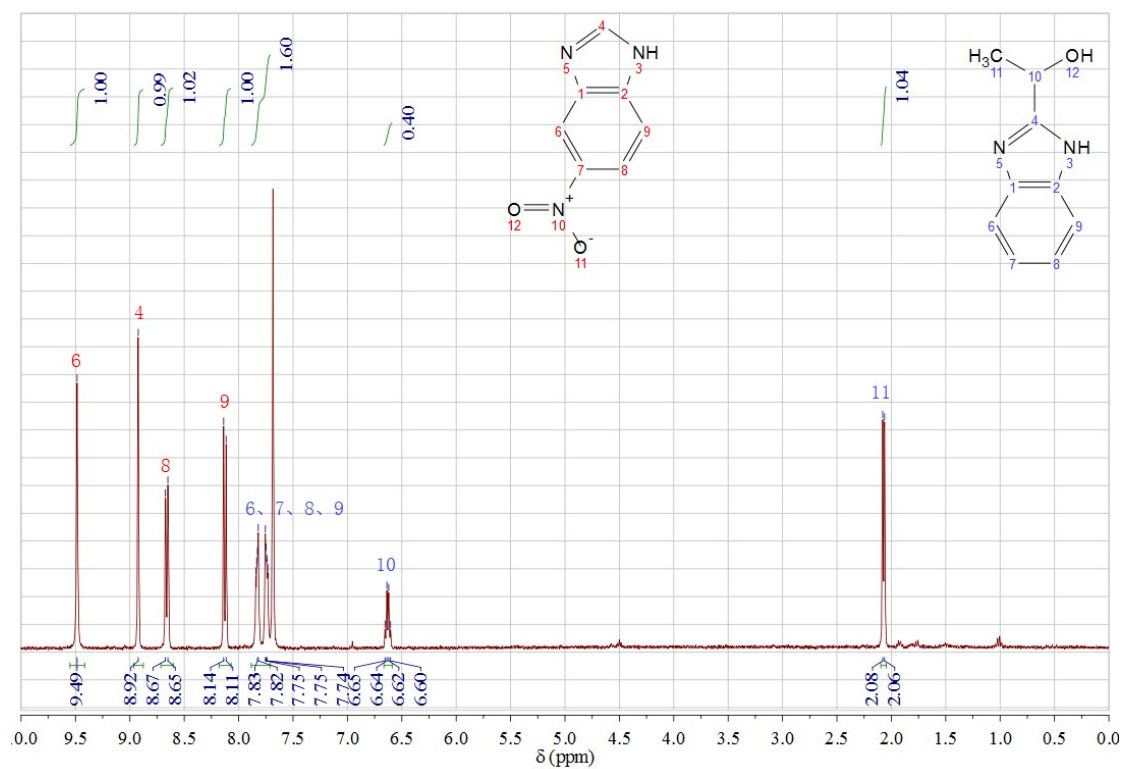

**Fig. S2**  $^1\text{H}$  NMR spectra (d-TFA) of S-ZIF-78h in detail.

$$\text{Exchange Ratio} = \frac{1.04}{3} \div \left( 1 + \frac{1.04}{3} \right) * 100\% = 25.7\%$$

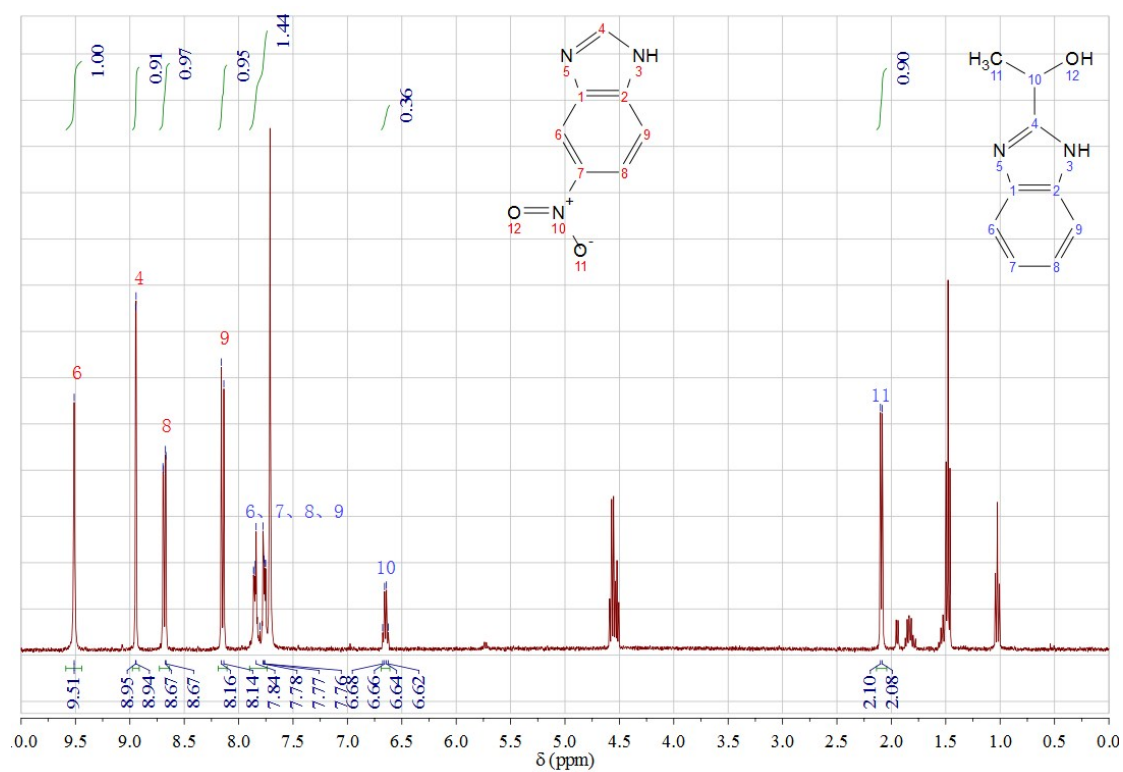

**Fig. S3**  $^1\text{H}$  NMR spectra (d-TFA) of R-ZIF-78h in detail.

$$\frac{0.90}{3} \div \left( 1 + \frac{0.90}{3} \right)$$

Exchange Ratio =  $\frac{0.90}{3} \div \left( 1 + \frac{0.90}{3} \right) * 100\% = 23.1\%$

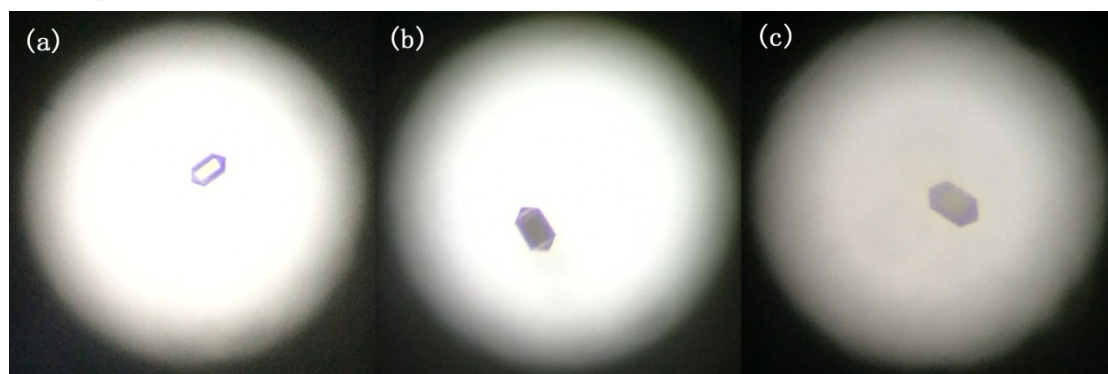

**Fig. S4** Photos of (a) ZIF-78, S-ZIF-78h (b) before and (c) after immersed in 0.07M D-proline for 8 hours.

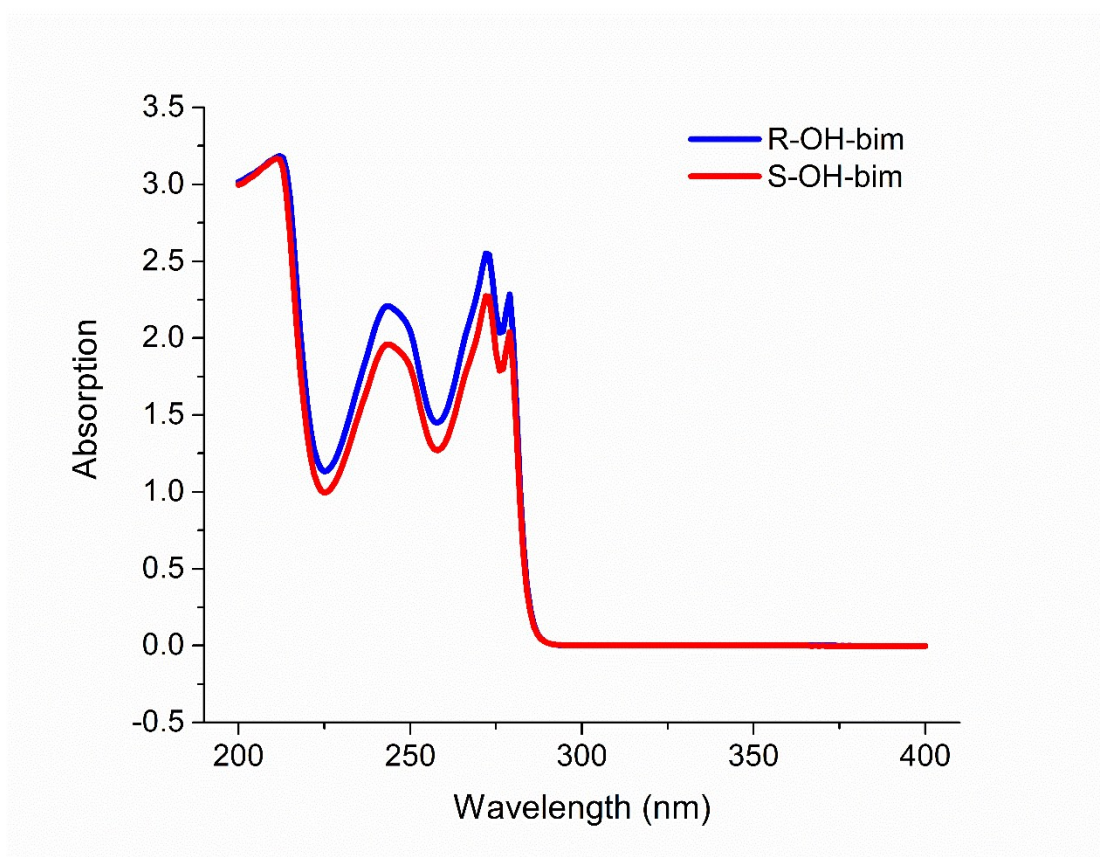

**Fig. S5** UV absorption spectra of S(R)-OH-bim in aqueous solution.

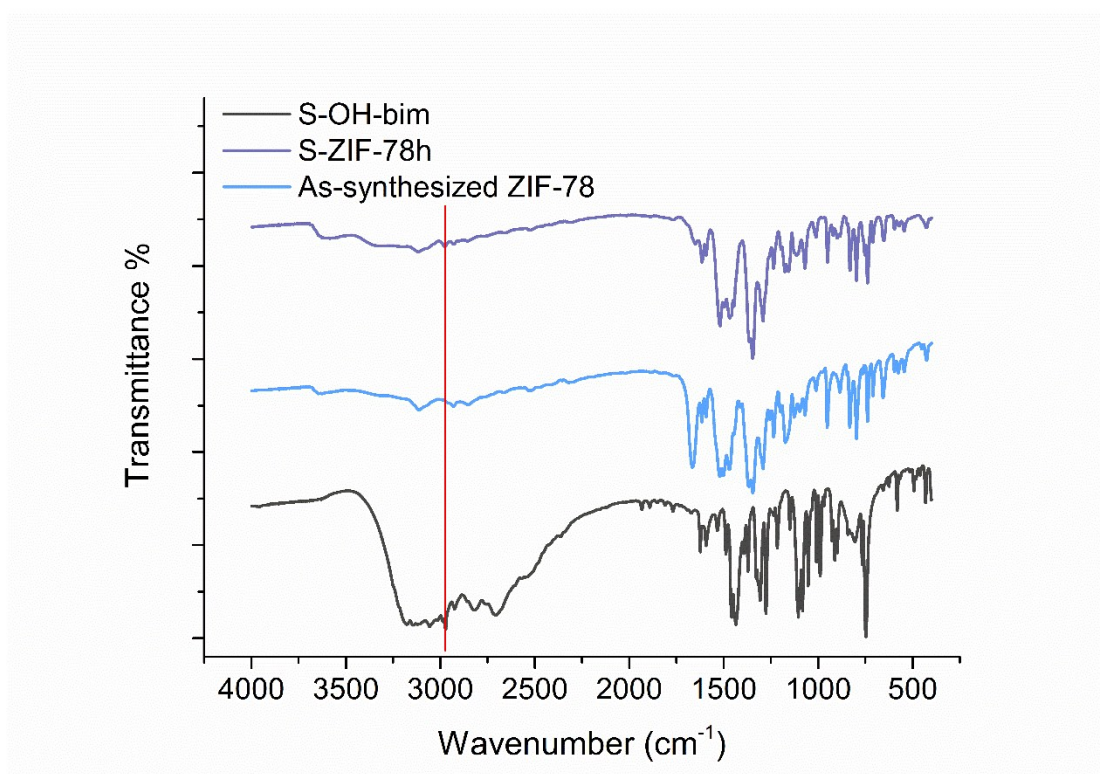

**Fig. S6** IR spectra of S-OH-bim, S-ZIF-78h and ZIF-78.

After SALE, S-ZIF-78h shows an extra weak absorption peak at  $2975\text{ cm}^{-1}$ , corresponding to C-H stretching vibration of  $\text{CH}_3$  which can only be observed in S-OH-bim. It indicated that 5- $\text{NO}_2$ -bim



did be replaced by S-OH-bim in a certain ratio.

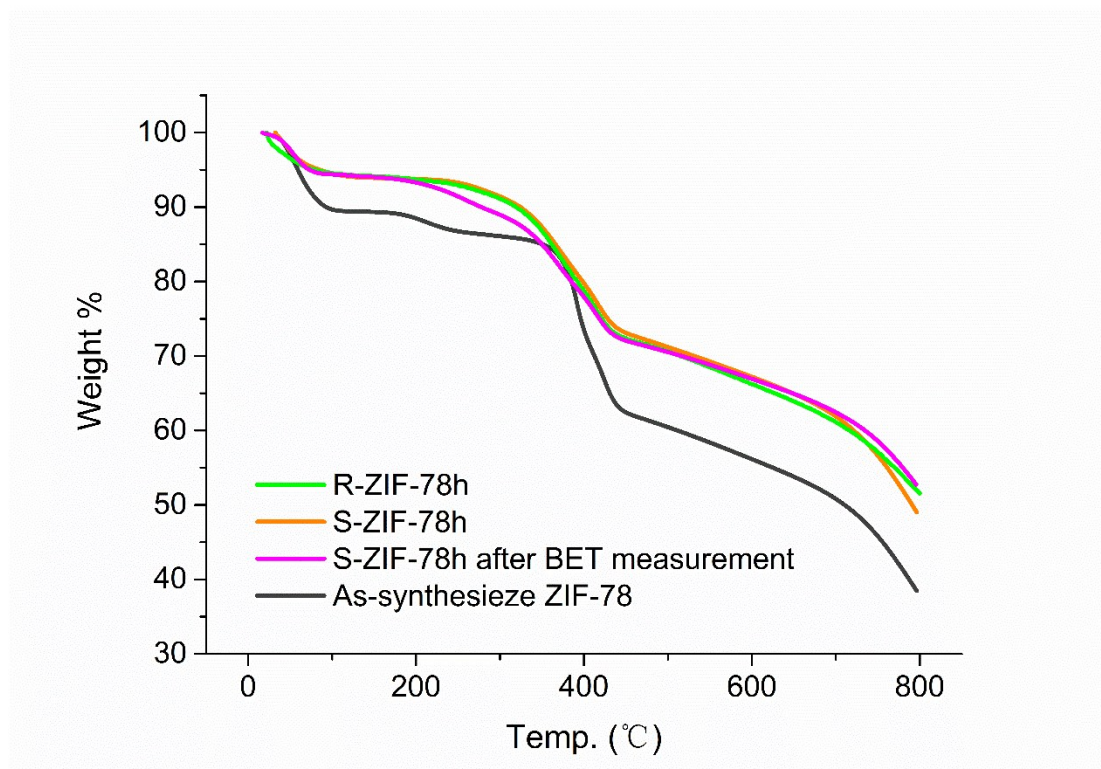

**Fig. S7** TGA analysis of S(R)-ZIF-78, S-ZIF-78h after BET measurement and as-synthesized ZIF-78.

After SALE, S(R)-OH-bim becomes less stable than ZIF-78, whose framework collapses at about 330 °C. The same weight-loss pattern indicates the same framework between S(R)-ZIF-78h and ZIF-78. So is S-ZIF-78h after BET measurement.

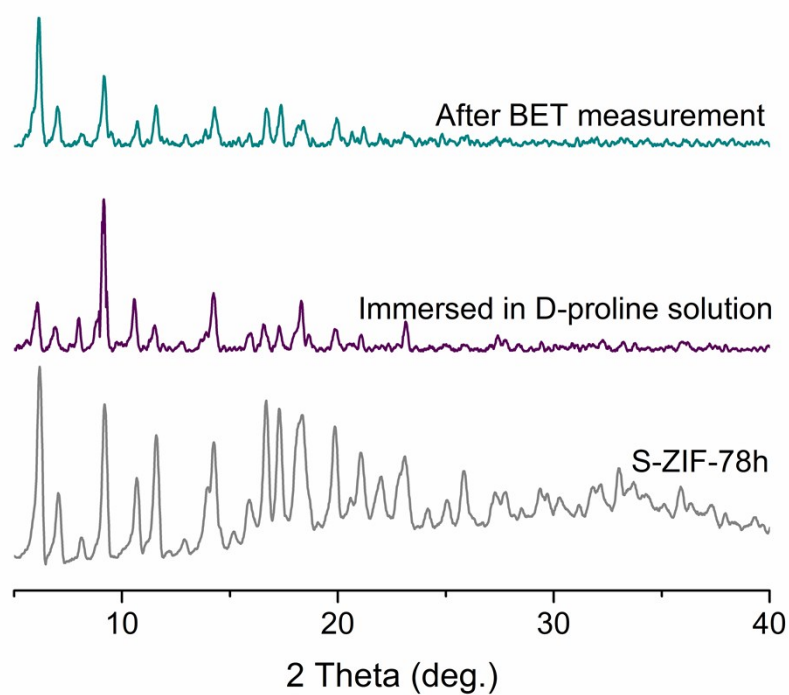

**Fig. S8** The powder XRD patterns of S-ZIF-78h, S-ZIF-78h after BET measurement and S-ZIF-78h in 0.07M D-proline for 8 hours.

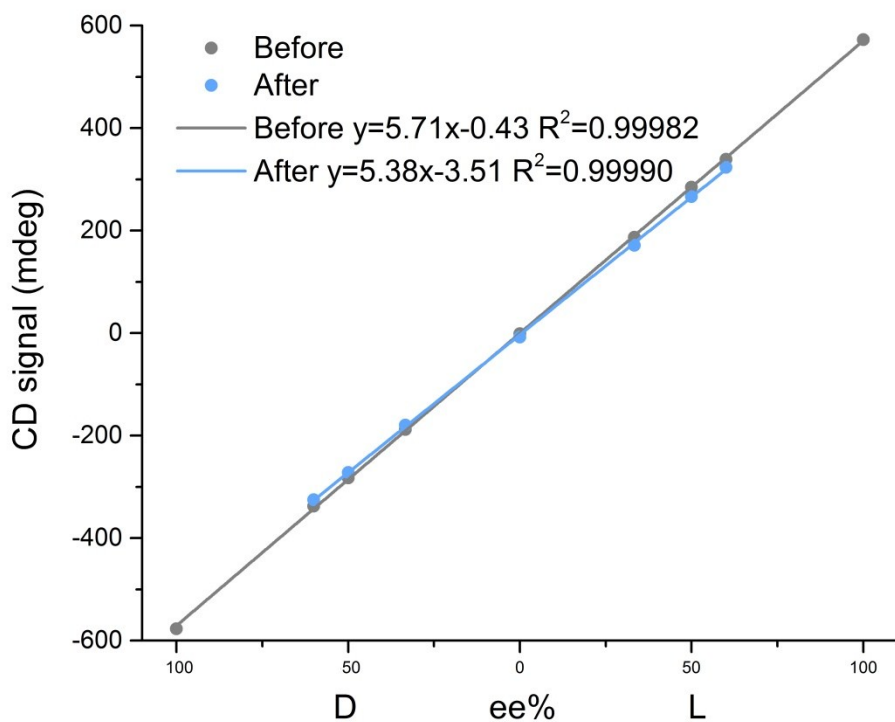

**Fig. S9** linear fits of CD signals at 214nm in different ee%.

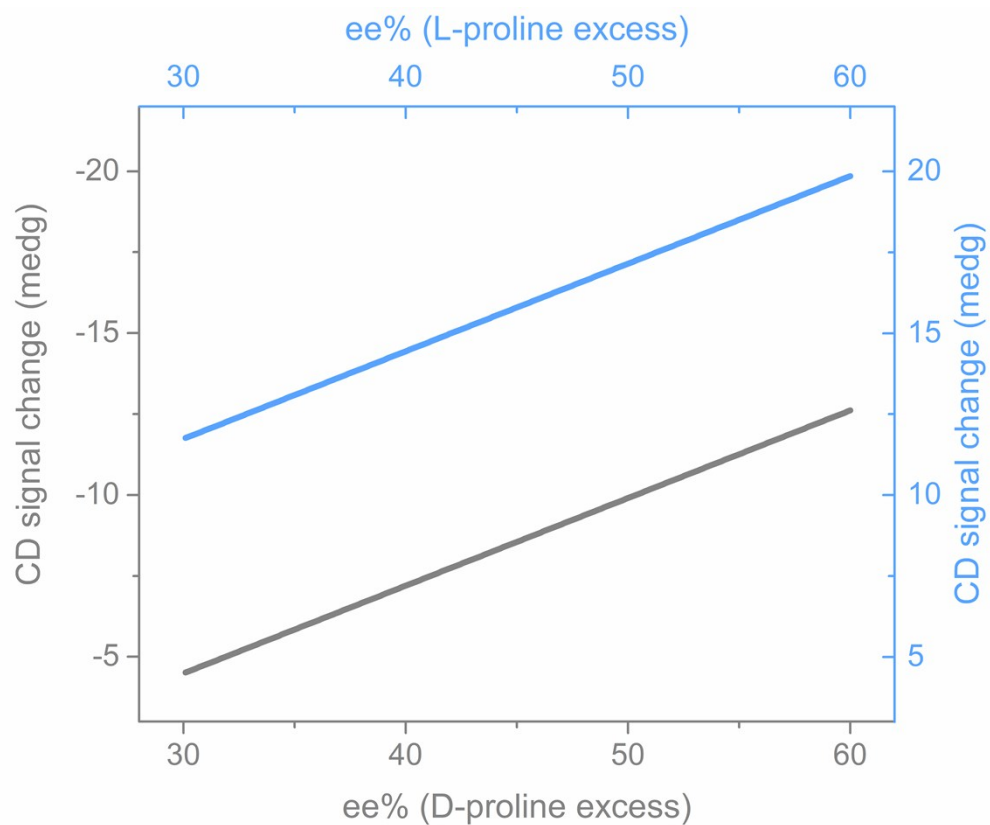

**Fig. S10** Absolute value changes of CD signals in different ee% according to linear fits.

- 1 F. Wang, Y. -H. Tang and J. Zhang, *Inorg. Chem.*, 2015, **54**, 11064.
- 2 Y. J. Ban, Y. S. Li, X. L. Liu, Y. Peng and W. S. Yang, *Micro. Meso. Mat.*, 2013, **173**, 29.
